# Supplementary material
Source: publisher figshare collection journal article supplement (https://f1000.figshare.com/ndownloader/files/101963)
Supplement: Supplementary file 1 [file 101963]

**Local indigenous knowledge about medicinal plants in and around  
Kakamega forest in western Kenya** (Nickson Otieno et al.)

**Structured Questionnaire**

**Preliminary questions**

- Respondent name:.....
- Respondent age:.....
- Respondent total duration or residence around study area:.....years

**Plant Attributes**

- Local name: .....
- Plant form (tick as appropriate. Filled in by interviewer from observation):  
Tree.....Shrub.....Herb.....Forbe.....Sedge.....Grass.....C  
limber.....Other(specify).....
- Plant origin (tick as appropriate):  
Indigenous.....Exotic).....
- Common (English) name: to be filled in by interviewer  
.....
- Family: (to be filled in by interviewer):.....
- Scientific name (to be filled in by  
interviewer):.....

**Collection site**

- In relation to forest (Tick as appropriate)  
Inside.....Outside):.....
- Forest block name: .....

**Symptoms or condition cured (List)**

1. ....
2. ....
3. ....
4. ....
5. ....

**Collection site description**

.....  
.....

**Part(s) used or from which medicine is extracted (tick as appropriate)**

Leaves .....  
Bark .....  
Roots .....  
Fruits .....  
Flowers .....  
Other (specify)

.....  
.....

**General preparation method**

.....  
.....  
.....

**Method of administering medication**

.....  
.....  
.....  
.....  
.....

**Patient age group (tick as appropriate)**

Elderly .....  
Adults.....  
Youth.....  
Children.....  
Infants.....  
All age groups.....

**Patient gender (tick as appropriate)**

Male .....  
Female.....  
Both genders .....

**Post-field open-ended focused discussion**

- Who possesses the general knowledge about these medicinal plants?
- Are there other beneficiaries of stakeholders to this indigenous knowledge other than the people around Kakamega forest?
- Any other information you may want to add?
